# Supplementary material for: The contribution of the alternative pathway in complement activation on cell surfaces depends on the strength of classical pathway initiation
Source: PubMed Central journal article supplement (PMC9881211; doi:10.1002/cti2.1436), 2023-01-27
Supplement: CTI2-12-e1436-s001.pdf [file CTI2-12-e1436-s001.pdf]

**(a) Red blood cells**

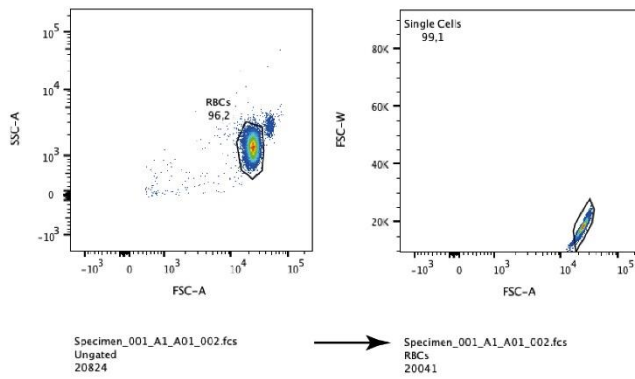

**(b) HAP1 KO CD46/55**

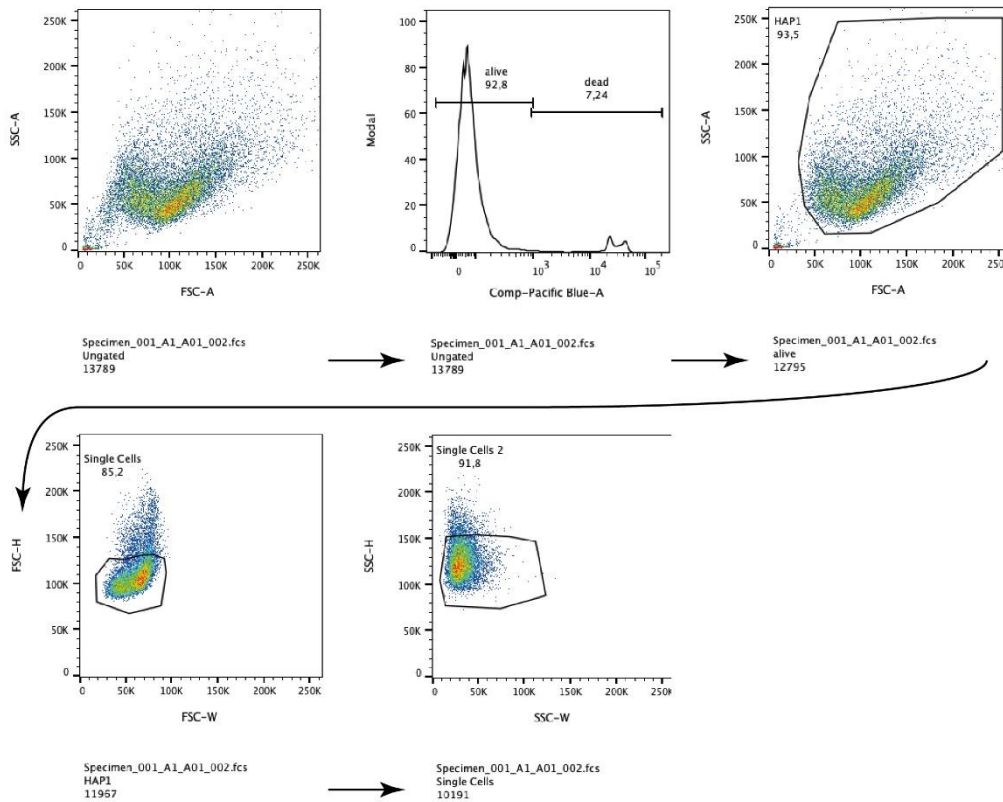

**(c) *Neisseria meningitidis***

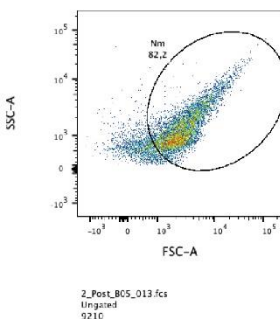

**Supplementary figure 1. FACS gating strategies. (a)** Cells were gated on red blood cells using SSC-A vs. FSC-A and then on single cells using FSC-W vs. FSC-A. **(b)** HAP1 CD56/CD55 KO cells were stained with DAPI to gate on living cells, then on SSC-A vs. FSC-A, FSC-H vs. FSC-W and SSC-H vs. SSC-W for single HAP1 cells. **(c)** Cells were gated on *N. meningitidis* on SSC-A vs. FSC-A.



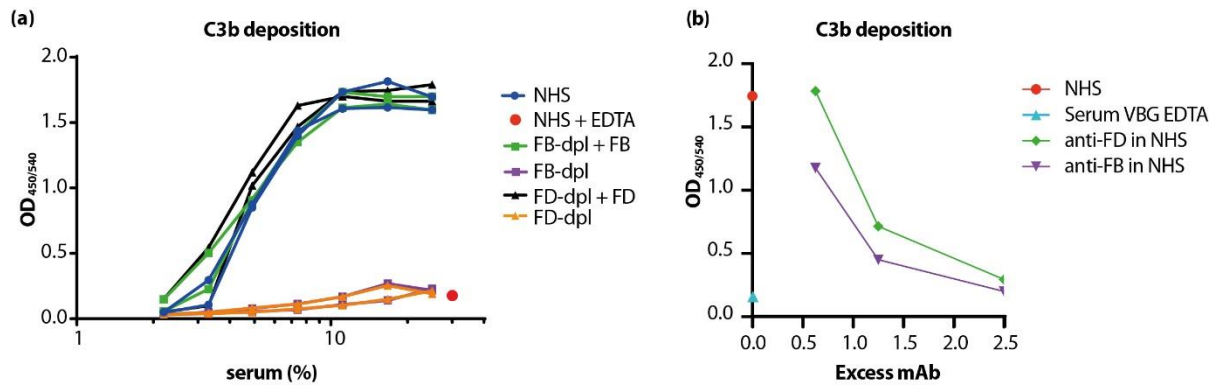

**Supplementary figure 2. Sera depleted of and antibodies against FB and FD both fully abrogate AP activation. (a)** FB- and FD-depleted sera showed a complete reduction in a C3b deposition ELISA in an AP-specific, Mg-containing buffer, which can be fully restored by the addition of FB and FD respectively. **(b)** The AP-specific C3b deposition ELISA showed that both anti-FB and anti-FD can reduce C3 deposition to the level of serum in EDTA at 2.5-fold excess mAb to serum protein in 20% serum. **a** shows pooled data from two independent experiments (each replicate), **b** for one experiment.

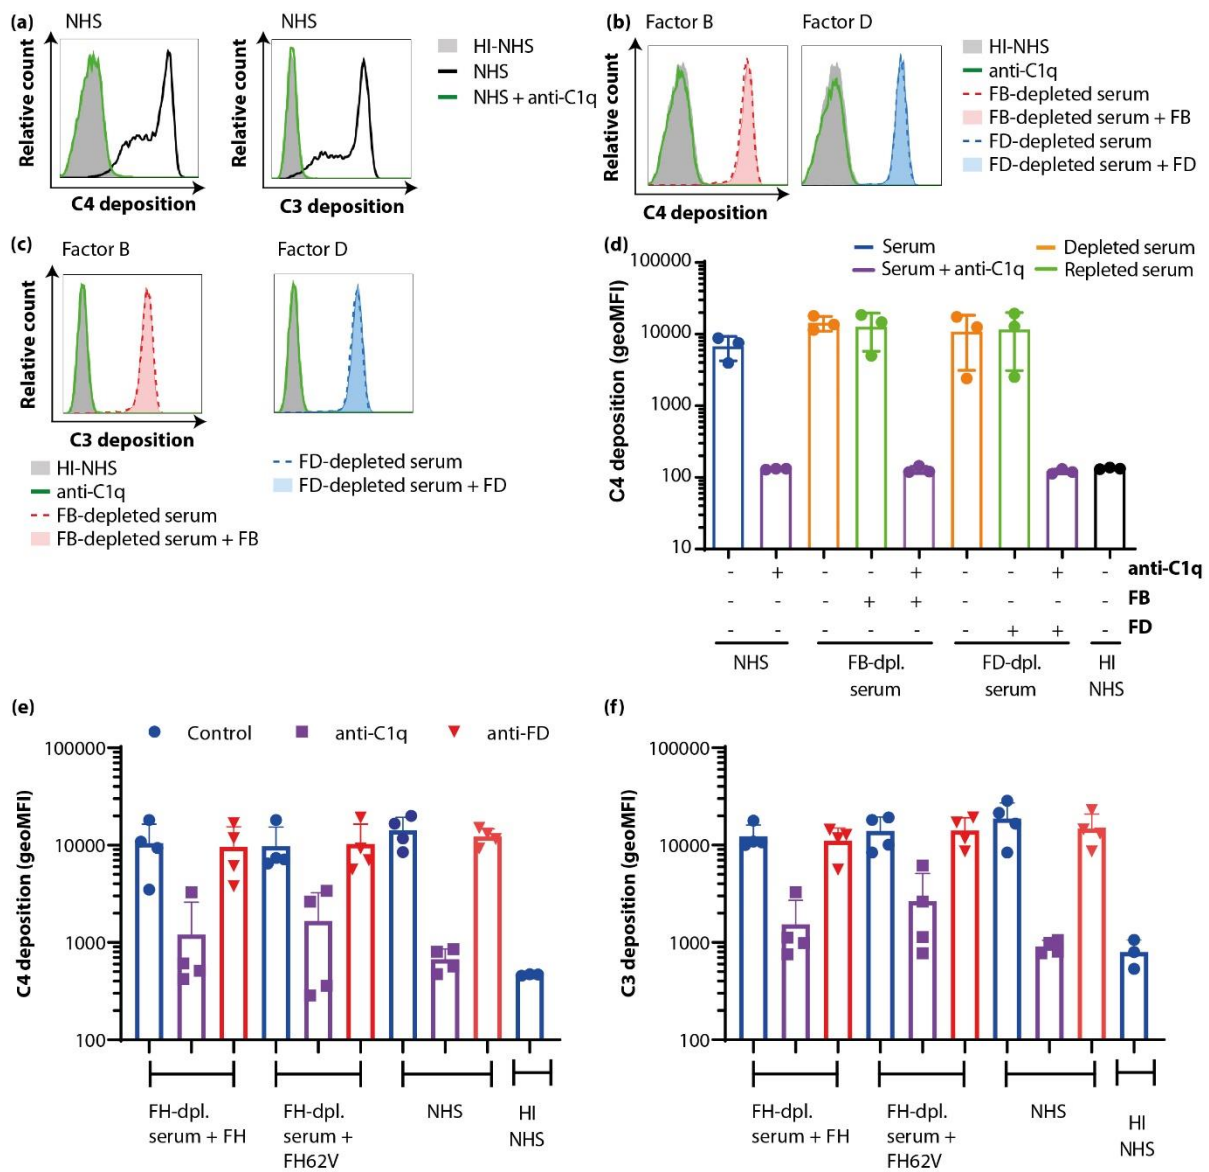

**Supplementary figure 3. Complement activation on HAP1 cells lacking complement regulators CD46 and CD55 is not AP dependent. (a)** C4 and C3 deposition by NHS on HAP1  $\Delta$ CD46/CD55 KO cells is completely inhibited by blocking the CP with anti-C1q. **(b)** C4 and **(c)** C3 deposition occurs on HAP1 CD46/CD55 KO cells both with and without FB and FD. **(d)** Quantification of the C4 deposition on HAP1 CD46/CD55 KO cells in NHS, FB- and FD-depleted serum with/without anti-C1q, FB and FD. **(e, f)** Quantification of C4 **(e)** and C3 **(f)** deposition on HAP1 CD46/CD55 KO cells by FH-depleted serum reconstituted with FH or FH<sub>62V</sub>, NHS or HI-NHS, with/without anti-C1q or anti-FD. Inhibition of the AP or CP both shows a similar result between wildtype FH and FH<sub>62V</sub>. **a–c** are representative graphs of  $n = 3$ , **d** shows mean + SD of  $n = 3$ , **e** and **f** show mean + SD of  $n = 4$ . Significance was tested using Friedman test with Dunn’s multiple comparisons test for **d** and with Kruskal-Wallis test with Dunn’s multiple comparisons test for **e** and **f**.

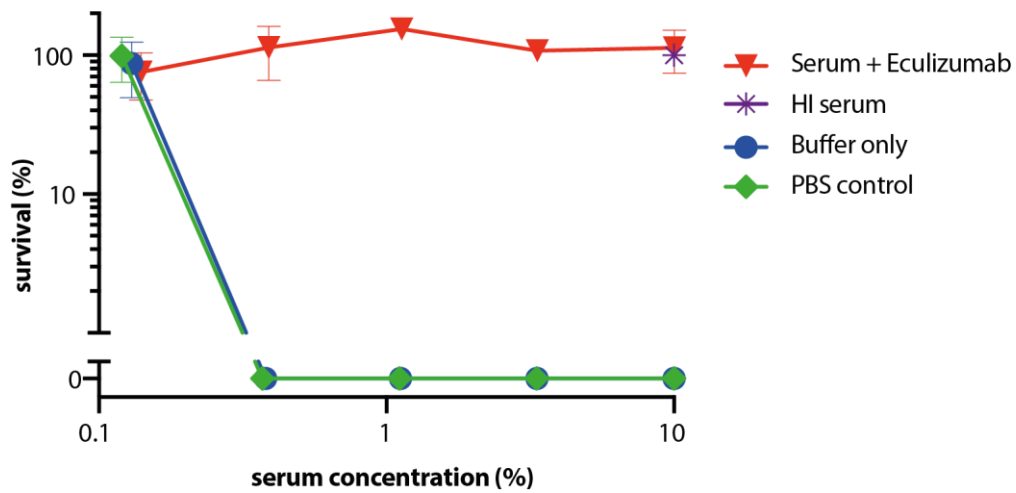

**Supplementary figure 4. Bacterial killing of *E. coli* by serum is complement-mediated** bacterial killing by serum is completely inhibited by eculizumab and HI NHS, indicating that this is mediated by the complement system. The figure shows the mean with SD from n = 3.
